# Supplementary material
Source: PubMed Central journal article supplement (PMC4787848)
Supplement: coor757302.wt1_default.pdf [file coor757302.wt1_default.pdf]

**Web table A. Characteristics of studies included in the review**

| Reference                           | Source* | Study name and country                                                                      | Characteristics of study population<br>- Mean (sd) age (y) at baseline;<br>range (where available)<br>- % female | Measures of physical capability examined (mean (sd))                                                                       | Ascertainment of mortality                                                                      | Length of follow-up       | QA score† |
|-------------------------------------|---------|---------------------------------------------------------------------------------------------|------------------------------------------------------------------------------------------------------------------|----------------------------------------------------------------------------------------------------------------------------|-------------------------------------------------------------------------------------------------|---------------------------|-----------|
| Ahmad and Bath, 2005 <sup>9</sup>   | Both    | Nottingham Longitudinal Study of Activity and Ageing, UK                                    | - 75.3 (6.1); 65-99<br>- 60.5%                                                                                   | Grip strength<br>Men: 342.36N (89.11)<br>Women: 197.73N (59.39)                                                            | Record linkage (UK NHS central register)                                                        | 21 years                  | 6.5       |
| Al Snih et al, 2002 <sup>10</sup>   | Both    | Hispanic Established Population for the Epidemiological Study of the Elderly (H-EPESE), USA | - 72.8 (6.4); 65-85+<br>- 57.5%                                                                                  | Grip strength<br>Men: 28.7kg (9.3)<br>Women: 18.3kg (6.5)<br>Walking time (8 feet)<br>Men: 7.6s (6.4)<br>Women: 8.1s (5.6) | Record linkage (Social Security Administration's Death Master files) and reports from relatives | 5 years                   | 8         |
| Anstey et al, 2001 <sup>11</sup>    | Both    | Australian Longitudinal Study of Ageing, Australia                                          | - 78.2 (7.0); 70-85+<br>- 53.9%                                                                                  | Grip strength<br>Men: 30.4kg (7.5)<br>Died: 18.8kg (5.5)                                                                   | Assessed at each wave and confirmed by official death records                                   | Average: 4 years 9 months | 8         |
| Cawthon and Ensrud <sup>38;40</sup> | Au      | Osteoporotic Fractures in Men (MrOS) study, USA                                             | - 73.5 (5.8); 65-100<br>- 0 i.e. 100% male                                                                       | Grip strength<br>Men: 38.7kg (8.1)<br>Chair rises<br>Descriptives not provided                                             | Death certificates                                                                              | 7.01 years                | n/a       |

|                                  |    |                                                               |                                |                                                                                                                                                                                                                                                           |                                                                                |                                |     |
|----------------------------------|----|---------------------------------------------------------------|--------------------------------|-----------------------------------------------------------------------------------------------------------------------------------------------------------------------------------------------------------------------------------------------------------|--------------------------------------------------------------------------------|--------------------------------|-----|
| Cawthon and Ensrud <sup>39</sup> | Au | Study of Osteoporotic Fractures (SOF), USA                    | - 71.7 (5.3); 65-99<br>- 100%  | Grip strength<br>Women: 20.9kg (4.3)<br>Chair rises<br>Descriptives not provided                                                                                                                                                                          | By contact every 4 months with confirmation by death certificate               | 14.5 years                     | n/a |
| Cesari et al, 2005 <sup>12</sup> | PO | Health, Aging and Body Composition (ABC) study, USA           | - 74.2 (2.9)<br>- 51.5%        | Walking speed<br>Men and women: 1.17m/s (0.24)                                                                                                                                                                                                            | Death certificates                                                             | Average: 4.9 years             | 8   |
| Cesari et al, 2008 <sup>13</sup> | PO | “Invecchiamento e Longevita nel Sirente” ilSIRENTE study, USA | - 85.6 (4.8); 80+<br>- 67%     | Grip strength<br>Died: 27.7kg (14.4)<br>Alive: 33.2kg (13.7)<br>Walking speed<br>Died: 0.35m/s (0.30)<br>Alive: 0.55m/s (0.28)<br>Chair rises<br>Relevant summary statistics not reported<br>Standing balance<br>Relevant summary statistics not reported | Reported by General Practitioners and confirmed by the National Death Registry | Up to 2 years (mean 1.8 years) | 8   |
| Cesari et al, 2009 <sup>14</sup> | PO | Health, Aging and Body Composition (ABC) study, USA           | - 73.6 (2.9); 70-79<br>- 51.6% | Walking speed<br>Men and women: 1.18m/s (0.23)<br>Chair rises (5)<br>Men and women: 14.3s (4.0)<br>Standing balance (max. score 90s)<br>Men and women: 67.6s                                                                                              | Death certificates                                                             | Average: 6.9 years             | 8   |

|                                          |      |                                                                               |                                                  |                                                                                                                                                        |                                                       |                                     |     |
|------------------------------------------|------|-------------------------------------------------------------------------------|--------------------------------------------------|--------------------------------------------------------------------------------------------------------------------------------------------------------|-------------------------------------------------------|-------------------------------------|-----|
|                                          |      |                                                                               |                                                  | (23.4)                                                                                                                                                 |                                                       |                                     |     |
| Fujita et al, 1995 <sup>15</sup>         | PO   | Prospective study of health-promotion center attendees, Japan                 | - Men: 53.6 (9.0), Women 54.5 (8.5); 40+ - 50.2% | Grip strength<br>Men: 41.8kg (7.7)<br>Women: 25.4kg (4.9)                                                                                              | Reported by family members and friends                | 6.1 years                           | 6   |
| Gale et al, 2007 <sup>16</sup>           | Both | Department of Health and Social Security Survey follow-up, UK                 | - 74.6 (5.97); 65-92 - 43.5%                     | Grip strength<br>Men: 68.7kg (15.7)<br>Women: 46.1kg (10.6)                                                                                            | Record linkage (UK NHS central register)              | 24 years                            | 7.5 |
| Guralnik and Patel <sup>43</sup>         | Au   | Established Populations for Epidemiologic Studies of the Elderly (EPESE), USA | - 87.7 (5.6); 70-103 - 64.7%                     | Chair rises (5)<br>Men: 13.6s (4.5)<br>Women: 14.9s (5.3)<br>Standing balance (3 tests each held for 10s)<br>Relevant summary statistics not available | Record linkage (National Death Index)                 | Median 4.8 years, up to 6 years     | n/a |
| Hardy et al, 2007 <sup>17;18</sup>       | PO   | Prospective cohort study (name not given), USA                                | - 73.9 (5.6); 65+ - 44.4%                        | Walking speed<br>Men and women: 0.88 m/s (0.24)                                                                                                        | Record linkage (Social Security National Death Index) | Up to 11 years                      | 8   |
| Katzmarzyk and Craig, 2002 <sup>19</sup> | Both | Canadian fitness survey, Canada                                               | - 35.7 (11.8); 20-69 - 51.5%                     | Grip strength<br>Men: 53.8kg (8.4)<br>Women: 32.5kg (5.5)                                                                                              | Record linkage (Canadian mortality database)          | 12.5 years                          | 7.5 |
| Klein et al <sup>44</sup>                | Au   | Beaver Dam Eye Study Cohort, USA                                              | - 68.9 (9.8); 53-97 - 57.0%                      | Grip strength<br>Men: 41.08kg (10.66)<br>Women: 23.37kg (6.75)<br>Walking time (8 feet)<br>Men: 2.86s (0.75)<br>Women: 3.06s (1.05)                    | Ascertained at regular follow-up attempts             | Average 3.53 years, up to 4.8 years | n/a |

|                                     |      |                                            |                                                                                  |                                                                                                                                     |                                                                                                                                    |                                       |     |
|-------------------------------------|------|--------------------------------------------|----------------------------------------------------------------------------------|-------------------------------------------------------------------------------------------------------------------------------------|------------------------------------------------------------------------------------------------------------------------------------|---------------------------------------|-----|
| Laukkanen et al, 1995 <sup>20</sup> | PO   | EVERGREEN project, Finland                 | - All aged 75 or 80y<br>- Sex distribution not reported (men and women included) | Grip strength<br>Relevant summary statistics not reported<br>Walking time (10m)<br>75y olds: 7.18s (4.12)<br>80y olds: 8.49s (3.62) | Record linkage (Official register or province and hospital records)                                                                | 48 – 58 months                        | 5   |
| Markides et al, 2001 <sup>35</sup>  | PO   | H-EPESE, USA                               | - Mean age not reported; 65+<br>- 58%                                            | Walking time (8 feet)<br>Relevant summary statistics not reported                                                                   | Record linkage (National Death Index) and reports from relatives                                                                   | 2 years                               | 7   |
| Metter et al, 2002 <sup>21</sup>    | Both | Baltimore Longitudinal Study of Aging, USA | - 50.1 (16.8);<br>18.1-98.5<br>- 0 i.e. 100% male                                | Grip strength<br>Men: 95.7kg (18.8)<br>(both hands combined)                                                                        | Record linkage (annual searches of National Death Index), telephone follow-up of non-respondents and correspondence from relatives | Average 22.7 years (up to 40.1 years) | 6.5 |
| Milne et al, 1984 <sup>22</sup>     | PO   | Edinburgh Longitudinal Study of Ageing, UK | - Mean age not reported; 62-90<br>- 57%                                          | Grip strength<br>Relevant summary statistics not reported                                                                           | Not reported                                                                                                                       | 5 years                               | 3   |
| Newman et al, 2006 <sup>23</sup>    | PO   | Health ABC Study, USA                      | - Men: 73.7 (2.9),<br>Women: 73.4 (2.8); 70-79<br>- 51%                          | Grip strength<br>Men: 40.8kg (8.5)<br>Women: 25.1kg (5.8)                                                                           | Hospital records, death certificates and informant interviews                                                                      | Average: 4.9 years (up to 6 years)    | 8   |
| Ostir et al, 2007 <sup>36</sup>     | PO   | H-EPESE, USA                               | - 72.0 (sd not reported); 65+<br>- 58.3%                                         | Walking time (8 feet)<br>Relevant summary statistics not reported                                                                   | Record linkage (National Death Index) and reports from relatives                                                                   | 7 years                               | 8   |

|                                    |      |                                                |                                                     |                                                                                                                                                                                           |                                                                                                                  |                   |     |
|------------------------------------|------|------------------------------------------------|-----------------------------------------------------|-------------------------------------------------------------------------------------------------------------------------------------------------------------------------------------------|------------------------------------------------------------------------------------------------------------------|-------------------|-----|
| Perera et al, 2005 <sup>24</sup>   | PO   | Prospective cohort study (name not given), USA | - 73.9 (5.6); 65+<br>- 44.4%                        | Walking speed<br>Men and women: 0.88 m/s (0.24)                                                                                                                                           | Record linkage (Social Security National Death Index)                                                            | 5 years           | 8   |
| Rantanen et al, 2000 <sup>25</sup> | Both | Honolulu Heart Program, Hawaii, USA            | - 54 (sd not reported); 45-68<br>- 0 i.e. 100% male | Grip strength<br>Men: 39.2kg (sd not reported)                                                                                                                                            | Newspaper obituaries, listings of death certificates and record linkage from 1991 onwards (National Death Index) | Up to 30 years    | 8   |
| Rolland et al, 2006 <sup>26</sup>  | Both | EPIDOS study, France                           | - 80.5 (3.76); 75-100<br>- 100%                     | Grip strength<br>Women: 52.76 N/m <sup>2</sup> (13.1)<br>Walking speed<br>Women: 0.89m/s (0.2)<br>Chair rises (5 times)<br>Women: 17.15s (8.1)<br>Standing balance<br>Women: 24.52s (6.5) | Through regular contact with study participants and by telephone calls to proxies and physicians                 | Up to 4 years     | 7.5 |
| Rosano et al, 2008 <sup>27</sup>   | PO   | Cardiovascular Health Study, USA               | - 74.0 (4.6)<br>- 56.8%                             | Walking speed<br>Men and women: 0.96m/s (0.2)                                                                                                                                             | Ascertained according to adjudicated events                                                                      | Median: 8.4 years | 7   |
| Rothman et al, 2008 <sup>28</sup>  | PO   | Precipitating Events Project (PEP), USA        | - 78.4 (5.3); 70+<br>- 64.6%                        | Grip strength<br>54% had 'low' grip strength<br>Walking time (back and forth over 10 foot                                                                                                 | Review of local obituaries and through informants reports                                                        | Up to 7.5 years   | 7   |

|                                      |      |                                                    |                                              |                                                                                                                                                                                                                                                                   |                                                                                       |                      |     |
|--------------------------------------|------|----------------------------------------------------|----------------------------------------------|-------------------------------------------------------------------------------------------------------------------------------------------------------------------------------------------------------------------------------------------------------------------|---------------------------------------------------------------------------------------|----------------------|-----|
|                                      |      |                                                    |                                              | course)<br>43% had walking time<br>>10s                                                                                                                                                                                                                           |                                                                                       |                      |     |
| Sasaki et al,<br>2007 <sup>29</sup>  | Both | Adult Health Study<br>Cohort, Japan                | - 54.3 (10.82); 35-<br>74<br>- 65.8%         | Grip strength<br>Men: 46.7kg (8.96)<br>Women: 29.3kg (6.31)                                                                                                                                                                                                       | Record linkage<br>(through Japan's<br>obligatory<br>household registry<br>system)     | 29.4 years           | 7.5 |
| Shibata et al,<br>1992 <sup>30</sup> | PO   | The Koganei Study,<br>Japan                        | - Mean age not<br>reported; 69-71<br>- 53.3% | Grip strength<br>Men: 35.4kg (6.9)<br>Women: 19.3kg (4.8)                                                                                                                                                                                                         | Record linkage<br>(assessment of<br>resident<br>registration) and<br>annual follow-up | 10 years             | 6   |
| Syddall et al,<br>2003 <sup>31</sup> | Both | Hertfordshire Ageing<br>Study, UK                  | - 67.5 (2.4); 64-74<br>- 42.4%               | Grip strength<br>Men: 38.3kg (7.1)<br>Women: 22.5kg (5.3)                                                                                                                                                                                                         | Record linkage<br>(UK NHS central<br>register)                                        | 4 years 10<br>months | 6.5 |
| Takata et al,<br>2007 <sup>32</sup>  | PO   | Study of Fukuoka<br>Prefecture residents,<br>Japan | - All participants<br>aged 80<br>- 60.3%     | Grip strength<br>Men: Survived: 32.4kg<br>(6.0); Died: 29.6kg<br>(7.4)<br>Women: Survived:<br>21.1kg (4.0); Died:<br>19.4kg (4.3)<br>Standing balance (up to<br>120s with eyes open)<br>Men: Survived: 17.9s<br>(10.1); Died: 12.1s<br>(15.0)<br>Women: Survived: | Record linkage<br>(resident<br>registration cards<br>and death<br>certificates)       | 4 years              | 7   |

|                                   |      |                                                                   |                                            |                                                                                                                               |                                                                               |                                 |     |
|-----------------------------------|------|-------------------------------------------------------------------|--------------------------------------------|-------------------------------------------------------------------------------------------------------------------------------|-------------------------------------------------------------------------------|---------------------------------|-----|
|                                   |      |                                                                   |                                            | 11.3s (11.9); Died:<br>13.1s (16.6)                                                                                           |                                                                               |                                 |     |
| van den Beld et al <sup>46</sup>  | Au   | The Zoetermeer Study, The Netherlands                             | - 77.8 (3.58); 73-94<br>- 0 i.e. 100% male | Grip strength<br>Men: 34.3kg (6.93)<br>Walking time (8 feet)<br>Men: 2.9s (0.99)<br>Chair rises (5 times)<br>Men: 12.0s (3.8) | Not reported                                                                  | 8 years                         | n/a |
| Willcox et al, 2006 <sup>33</sup> | Both | Honolulu Heart Program and Honolulu Asia Aging Study, Hawaii, USA | - 54; 45-68<br>- 0 i.e. 100% male          | Grip strength<br>Men: 38.39kg (range: 8-63)                                                                                   | Obituaries in local newspapers and surveillance of hospital discharge records | Up to 43 years (mean: 27 years) | 7   |
| Woo et al, 1999 <sup>37</sup>     | Both | Hong Kong Old-Old Study, Hong Kong                                | - 79.7 (7.13); 70-107<br>- 49.2%           | Walking time (16 feet)<br>Men: 11.8s (6.49)<br>Women: 14.7s (10.13)                                                           | Reports from relatives and caregivers and search of Death registry            | Average: 38.74 months           | 6.5 |

\* Source of results for inclusion in review

Both: Results available in published paper and additional results also provided for review by author

PO: Results available from published paper only

Au: Results provided by author, not available in published paper

† Quality assessment score (maximum score:8) – average of 2 independent assessor's scores presented
